# Supplementary material
Source: ML conference proceedings conference paper supplement (https://proceedings.neurips.cc/paper_files/paper/2023/hash/d842425e4bf79ba039352da0f658a906-Abstract.html)
Supplement: Supplementary file 1 [file d842425e4bf79ba039352da0f658a906-Supplemental-Conference.pdf]

## 1 A API Details

2 When sampling and filtering API calls, by default we use values of  $\tau_s = 0.05$  and  $\tau_f = 1.0$  – i.e.,  
3 we only make API calls at positions where the probability of the <API> token is at least 5%, and we  
4 keep API calls if they reduce the loss by at least 1.0. We only keep the top  $k = 5$  such positions and  
5 sample up to  $m = 5$  API calls for each position identified in a piece of text. Due to the heuristic  
6 filtering described below, we generate API calls for the calculator and machine translation system on  
7 only a small subset of  $\mathcal{C}$ ; to compensate for this, we set  $\tau_s = 0.0$ ,  $k = 20$  and  $m = 10$  for these tools.  
8 As the resulting sets of API calls are still comparably small, we additionally set  $\tau_f = 0.5$ .

### 9 A.1 Implementation

10 **Question Answering** We use the Atlas model of Izacard et al. (2022) finetuned on Natural Questions  
11 (Kwiatkowski et al., 2019) as our question answering system. For creating  $\mathcal{C}^*$  we use Atlas-large,  
12 enabling us to efficiently process millions of API calls; during inference, we use the larger Atlas-xxl  
13 model.

14 **Calculator** Our calculator is based on a simple Python script and only supports the operators “+”,  
15 “−”, “\*”, and “/”. It does not return any result for syntactically invalid equations. For sampling  
16 API calls, we apply heuristic filters to our subset of CCNet and only process documents that either  
17 (i) contain at least three numbers within a window of 100 tokens, where one of these numbers is  
18 the result of applying a mathematical operation to the other two, (ii) contain one of the sequences  
19 “=”, “equals”, “equal to”, “total of”, “average of” followed by a number, or (iii) contain at least three  
20 numbers; for texts that only match the last criterion, we only keep a random subset of 1%.

21 **Calendar** For creating our dataset  $\mathcal{C}^*$ , we operate under the assumption that the calendar date in  
22 such cases should be the date that the document was created. We approximate this by extracting the  
23 date from the URL, if it is present. We filter out texts for which a date cannot be extracted, leaving  
24 around 18% of the documents.

25 **Machine Translation** For both training and inference, we use the 600M parameter NLLB (Costa-  
26 jussà et al., 2022) as our machine translation (MT) model. The source language is automatically  
27 detected using the fastText classifier (Joulin et al., 2016), while the target language is always set  
28 to English. Since most of the CCNet dataset is in English, we filter out the parts that contain only  
29 English text before generating API calls. More specifically, we only keep those paragraphs which  
30 contain text chunks in a language other than English preceded and followed by English text. We use  
31 text chunks of size 10 tokens. To determine whether the middle text chunk is in a language different  
32 than English we again use the fastText classifier with a confidence greater than 0.8. We also filter out  
33 any text chunks that contain only numbers or special symbols. This filtering mechanism allows us to  
34 generate data more efficiently by focusing our API call generations in places where the MT tool is  
35 likely to be helpful. After generating the MT API calls, we additionally remove from our training set  
36 those where the input to the MT tool appears after the API call but not before it. While during data  
37 generation the model can look ahead to generate API calls, this is not possible at inference time, so  
38 we want to dissuade the model from calling the API in such cases.

### 39 A.2 Prompts

40 Below, we list the prompts used to sample API calls for each tool considered.

41 **Question Answering** We use the following prompt for the question answering tool:

42 Your task is to add calls to a Question Answering API to a piece of text. The  
43 questions should help you get information required to complete the text. You can  
44 call the API by writing "[QA(question)]" where "question" is the question you want  
45 to ask. Here are some examples of API calls:

46 Input: Joe Biden was born in Scranton, Pennsylvania.

47 Output: Joe Biden was born in [QA("Where was Joe Biden born?")] Scranton, [QA("In  
48 which state is Scranton?")] Pennsylvania.

49

50 Input: Coca-Cola, or Coke, is a carbonated soft drink manufactured by the Coca-Cola  
51 Company.  
52 Output: Coca-Cola, or [QA("What other name is Coca-Cola known by?")] Coke, is  
53 a carbonated soft drink manufactured by [QA("Who manufactures Coca-Cola?")] the  
54 Coca-Cola Company.  
55  
56 Input: x  
57 Output:

58 **Calculator** We use the following prompt for the calculator:

59 Your task is to add calls to a Calculator API to a piece of text. The calls should  
60 help you get information required to complete the text. You can call the API by  
61 writing "[Calculator(expression)]" where "expression" is the expression to be  
62 computed. Here are some examples of API calls:  
63 Input: The number in the next term is  $18 + 12 \times 3 = 54$ .  
64 Output: The number in the next term is  $18 + 12 \times 3 =$  [Calculator(18 + 12 \* 3)] 54.  
65  
66 Input: The population is 658,893 people. This is 11.4% of the national average of  
67 5,763,868 people.  
68 Output: The population is 658,893 people. This is 11.4% of the national average of  
69 [Calculator(658,893 / 11.4%)] 5,763,868 people.  
70  
71 Input: A total of 252 qualifying matches were played, and 723 goals were scored (an  
72 average of 2.87 per match). This is twenty goals more than the 703 goals last year.  
73 Output: A total of 252 qualifying matches were played, and 723 goals were scored (an  
74 average of [Calculator(723 / 252)] 2.87 per match). This is twenty goals more than  
75 the [Calculator(723 - 20)] 703 goals last year.  
76  
77 Input: I went to Paris in 1994 and stayed there until 2011, so in total, it was 17  
78 years.  
79 Output: I went to Paris in 1994 and stayed there until 2011, so in total, it was  
80 [Calculator(2011 - 1994)] 17 years.  
81  
82 Input: From this, we have  $4 \times 30$  minutes = 120 minutes.  
83 Output: From this, we have  $4 \times 30$  minutes = [Calculator(4 \* 30)] 120 minutes.  
84  
85 Input: x  
86 Output:

87 **Wikipedia Search** We use the following prompt for the Wikipedia search tool:

88 Your task is to complete a given piece of text. You can use a Wikipedia Search API  
89 to look up information. You can do so by writing "[WikiSearch(term)]" where "term"  
90 is the search term you want to look up. Here are some examples of API calls:  
91 Input: The colors on the flag of Ghana have the following meanings: red is for the  
92 blood of martyrs, green for forests, and gold for mineral wealth.  
93 Output: The colors on the flag of Ghana have the following meanings: red is for  
94 [WikiSearch("Ghana flag red meaning")] the blood of martyrs, green for forests, and  
95 gold for mineral wealth.  
96  
97 Input: But what are the risks during production of nanomaterials? Some nanomaterials  
98 may give rise to various kinds of lung damage.  
99 Output: But what are the risks during production of nanomaterials?  
100 [WikiSearch("nanomaterial production risks")] Some nanomaterials may give rise  
101 to various kinds of lung damage.  
102  
103 Input: Metformin is the first-line drug for patients with type 2 diabetes and  
104 obesity.  
105 Output: Metformin is the first-line drug for [WikiSearch("Metformin first-line  
106 drug")] patients with type 2 diabetes and obesity.  
107  
108 Input: x  
109 Output:

110 **Machine Translation** We use the following prompt for the machine translation tool:

111 Your task is to complete a given piece of text by using a Machine Translation API.  
112 You can do so by writing "[MT(text)]" where text is the text to be translated into  
113 English.

114 Here are some examples:

115

116 Input: He has published one book: O homem suprimido (“The Supressed Man”)

117 Output: He has published one book: O homem suprimido [MT(O homem suprimido)] (“The  
118 Supressed Man”)

119

120 Input: In Morris de Jonge’s Jeschuah, der klassische jüdische Mann, there is a  
121 description of a Jewish writer

122 Output: In Morris de Jonge’s Jeschuah, der klassische jüdische Mann [MT(der  
123 klassische jüdische Mann)], there is a description of a Jewish writer

124

125 Input: 南京高淳县住房和城乡建设局 城市新区设计 a plane of reference Gaochun is one of  
126 seven districts of the provincial capital Nanjing

127 Output: [MT(南京高淳县住房和城乡建设局 城市新区设计)] a plane of reference Gaochun is  
128 one of seven districts of the provincial capital Nanjing

129

130 Input: x

131 Output:

132 **Calendar** We use the following prompt for the calendar tool:

133 Your task is to add calls to a Calendar API to a piece of text. The API calls should  
134 help you get information required to complete the text. You can call the API by  
135 writing "[Calendar()]" Here are some examples of API calls:

136

137 Input: Today is the first Friday of the year.

138 Output: Today is the first [Calendar()] Friday of the year.

139

140 Input: The president of the United States is Joe Biden.

141 Output: The president of the United States is [Calendar()] Joe Biden.

142

143 Input: The current day of the week is Wednesday.

144 Output: The current day of the week is [Calendar()] Wednesday.

145

146 Input: The number of days from now until Christmas is 30.

147 Output: The number of days from now until Christmas is [Calendar()] 30.

148

149 Input: The store is never open on the weekend, so today it is closed.

150 Output: The store is never open on the weekend, so today [Calendar()] it is closed.

151

152 Input: x

153 Output:

## 154 **B Toolformer Training**

155 We use up to 25k examples per API and train with a maximum sequence length of 1,024, using an  
156 effective batch size of 128. All models are trained using DeepSpeed’s ZeRO-3 (Rasley et al., 2020)  
157 on 8 NVIDIA A100 40GB GPUs with BF16. Training is performed for up to 2,000 steps (requiring  
158 approximately 10h), where we evaluate perplexity on a small development set from CCNet containing  
159 1,000 examples every 500 steps and pick the checkpoint that performs best on this development set.

## 160 **C Zero-Shot Prompts**

### 161 **C.1 LAMA and TEMPLAMA**

162 For both LAMA and TEMPLAMA, given an input text  $x$ , we use the following prompt: Please  
163 complete the following text so that it is factually correct:  $x$ .

Table 1: Templates used to create DATESET where a *current\_date* is randomly selected. For each *current\_date*, a random *past\_date* and *future\_date* is generated and used to fill each template, if relevant. The federal holidays in the United States (e.g., Thanksgiving) were used in the templates involving holidays.

| Template                                                                                                                                           | Size  |
|----------------------------------------------------------------------------------------------------------------------------------------------------|-------|
| How many days {ago was, are there until} { <i>past_date</i> , <i>future_date</i> }?                                                                | 400   |
| What {day of the week, day of the month, month, year} was it ( <i>current_date</i> – <i>past_date</i> ) {days, weeks, months, years} ago?          | 800   |
| What {day of the week, day of the month, month, year} will it be in ( <i>future_date</i> – <i>current_date</i> ) days?                             | 800   |
| What day of the week {is, was} it on { <i>past_date</i> , <i>future_date</i> }?                                                                    | 400   |
| What {day of the week, day of the month, month, year} {is, was} it {the day before yesterday, yesterday, today, tomorrow, the day after tomorrow}? | 4,000 |
| What {day of the week, day of the month, month} {is, was} <i>holiday</i> this year?                                                                | 1,800 |
| How many {days, weeks, months, years} {ago was, are there until} <i>holiday</i> this year?                                                         | 1,200 |
| Total                                                                                                                                              | 9,400 |

Table 2: Perplexities of different models on WikiText and our validation subset of CCNet. Adding API calls comes without a cost in terms of perplexity for language modeling without any API calls.

| Model                 | WikiText   | CCNet       |
|-----------------------|------------|-------------|
| GPT-J                 | <b>9.9</b> | 10.6        |
| GPT-J + CC            | 10.3       | <b>10.5</b> |
| Toolformer (disabled) | 10.3       | <b>10.5</b> |

## 164 C.2 Math Benchmarks

165 For all math benchmarks, given a context  $x$  and a question  $q$ , our prompt is:  $x$   $q$  The answer is.

## 166 C.3 Question Answering

167 For all question answering datasets, including DATESET, we simply prefix the question with Answer  
 168 the following question:. We append a question mark if the question does not already end with  
 169 one.

## 170 C.4 Multilingual Question Answering

171 For MLQA, given a context  $x$  and a question  $q$ , our prompt is: Your task is to answer  
 172 a question based on the following paragraph:  $x$  Now answer the following  
 173 question in English:  $q$ .

## 174 C.5 LLaMA Question Answering

175 For question answering in LLaMA + Toolformer investigations in Appendix G, we use the following  
 176 prompt: "Q: {question}\nA:". This prompt is standardly used in these tasks, and was used for  
 177 the LLaMA toolformer investigations.

## 178 D DATESET

179 DATESET is created by first randomly selecting 500 “current dates”. For each current date, another  
 180 relatively past/future date is randomly selected within a four-year range, and the two dates are used to  
 181 fill the query templates in Table 1. An example of one such query using the first template would be,  
 182 “How many days ago was August 14, 2020?” If called, the Calendar tool would return the presumed  
 183 current date (e.g., “Today is Sunday, November 20, 2020”).

Table 3: Toolformer results on the T-REx subset of LAMA and on WebQS for different values of  $k$  used during decoding. Numbers shown are overall performance (All), performance on the subset where the model decides to make an API call (AC) and all remaining examples (NC), as well as the percentage of examples for which the model decides to call an API (%).

| $k$ | T-REx       |      |      |      | WebQS       |      |      |       |
|-----|-------------|------|------|------|-------------|------|------|-------|
|     | All         | AC   | NC   | %    | All         | AC   | NC   | %     |
| 0   | 34.9        | –    | 34.9 | 0.0  | 18.9        | –    | 18.9 | 0.0   |
| 1   | 47.8        | 53.0 | 44.3 | 40.3 | 19.3        | 17.1 | 19.9 | 8.5   |
| 3   | 52.9        | 58.0 | 29.0 | 82.8 | <b>26.3</b> | 26.5 | 6.6  | 99.3  |
| 10  | <b>53.5</b> | 54.0 | 22.5 | 98.1 | <b>26.3</b> | 26.4 | –    | 100.0 |

## 184 E Additional Analysis

185 **Decoding Strategy** We investigate the effect of our modified decoding strategy introduced in  
 186 Section 4, where instead of always generating the most likely token, we generate the <API> token if  
 187 it is one of the  $k$  most likely tokens. Table 3 shows performance on the T-REx subset of LAMA and  
 188 on WebQS for different values of  $k$ . As expected, increasing  $k$  leads to the model doing API calls  
 189 for more examples – from 40.3% and 8.5% with  $k = 1$  (i.e., regular greedy decoding) to 98.1% and  
 190 100% for  $k = 10$ . While for T-REx, there is already a clear improvement in performance with greedy  
 191 decoding, on WebQS our model only starts to make a substantial number of API calls as we slightly  
 192 increase  $k$ . Interestingly, for  $k = 1$  the model is calibrated to some extent: It decides to call APIs for  
 193 examples that it would perform particularly badly on without making API calls. This can be seen  
 194 from the fact that performance on examples where it decides *not* to make an API call (44.3 and 19.9)  
 195 is higher than average performance if no API calls are made at all (34.9 and 18.9). However, this  
 196 calibration is lost for higher values of  $k$ .

197 **Data Quality** We qualitatively analyze some API calls generated with our approach for different  
 198 APIs. Table 4 shows some examples of texts from CCNet augmented with API calls, as well as the  
 199 corresponding score  $L_i^- - L_i^+$  that is used as a filtering criterion, and whether the API calls made  
 200 by the model are intuitively useful in the given context. As can be seen, high values of  $L_i^- - L_i^+$   
 201 typically correspond to useful API calls, whereas low values correspond to API calls that do not  
 202 provide any information that is useful for predicting future tokens. There are some exceptions, e.g.,  
 203 an API call for “Fast train success” in the fourth example that does not give any relevant information  
 204 but still reduces perplexity. However, some amount of noise in the API calls that are not filtered can  
 205 actually be useful as it forces the model finetuned on  $C^*$  to not always blindly follow the results of  
 206 each call it makes.

## 207 F Failure Modes

208 During our evaluation, we observe that failure can arise from the following: failing to call the tool,  
 209 calling the wrong tool, calling the tool incorrectly, receiving a useless or wrong result from the tool,  
 210 or failing to come to the wrong conclusion using the tool results. While a detailed and quantitative  
 211 classification of each failure for each task and tool would require careful human annotation, we do  
 212 observe certain broad trends.

213 **Failing to call the tool** At evaluation time, we generally see an under-use of tool usage, possibly  
 214 due to the difference in distribution between our fine-tuning dataset and evaluation datasets. While  
 215 the former consists of CCNet paragraphs, the latter consists of very short question-answering style  
 216 queries, in the case of the QA tasks. We note that tools are far from being called for every question,  
 217 especially where the answer is strongly in-weights.

218 **Calling the wrong tool or calling the correct tool incorrectly** We find Toolformer very often calls  
 219 an appropriate tool, and it can often judge the context correctly. In the maths section, we do observe  
 220 occasional calls to Question Answering and WikiSearch, likely because examples using these tools  
 221 are much more frequent in the fine-tuning dataset than those using the calculator tool.

| Example                                                                                                                                                                                                                                                                                                                                                                                                                                                                                                                                                                                       | $L_i^- - L_i^+$ | Useful |
|-----------------------------------------------------------------------------------------------------------------------------------------------------------------------------------------------------------------------------------------------------------------------------------------------------------------------------------------------------------------------------------------------------------------------------------------------------------------------------------------------------------------------------------------------------------------------------------------------|-----------------|--------|
| The Flodden Window (a war memorial dedicated to The Middleton Archers), in the Grade I-listed Church of St Leonard in Middleton is said to be the oldest war memorial in the United Kingdom. <b>&lt;API&gt; WikiSearch(War memorial Flodden) → Battle of Flodden &gt; Commemoration &gt; The stained-glass Flodden Window in Middleton Parish Church [...] was constructed by Sir Richard Assheton in memory of the Battle of Flodden and the archers from Middleton who fought in it. &lt;/API&gt;</b> Sir Richard Assheton of Middleton (who built St Leonard) was granted knighthood [...] | 5.49            | ✓      |
| Note: The WL will be open on Friday, <b>&lt;API&gt; Calendar() → Today is Thursday, March 9, 2017. &lt;/API&gt;</b> March 10, and Sunday, March 19 for regular hours.                                                                                                                                                                                                                                                                                                                                                                                                                         | 2.11            | ✓      |
| The Nile has an approximate length of <b>&lt;API&gt; QA(What is the approximate length of the Nile?) → 6,853 km &lt;/API&gt;</b> 6,853 kilometers, the White Nile being its main source.                                                                                                                                                                                                                                                                                                                                                                                                      | 2.08            | ✓      |
| If Venus had an atmosphere similar to Earth’s then you would expect Venus’ mean temperature to be 499 K (1.74 x 287) rather than 735 K which is <b>&lt;API&gt; Calculator(735 / 499) → 1.47 &lt;/API&gt;</b> 1.47 (735 / 499) times hotter than it should be.                                                                                                                                                                                                                                                                                                                                 | 1.59            | ✓      |
| You are here: Home / Featured / Catch this fast train to success! <b>&lt;API&gt; WikiSearch(Fast train success) → Fast Train &gt; It also peaked at #23 on the Canadian CHUM singles chart, on June 26, 1971. The success of this single established Myles Goodwyn as the band’s main songwriter, and made it possible for April Wine to record a second album. &lt;/API&gt;</b> Don’t wait weeks and [...]                                                                                                                                                                                   | 0.92            | ✗      |
| Os Melhores Escolas em Jersey 2020 <b>&lt;API&gt; MT(Os Melhores Escolas em Jersey) → The Best Schools in Jersey &lt;/API&gt;</b> On this page you can search for Universities, Colleges and Business schools in Jersey                                                                                                                                                                                                                                                                                                                                                                       | 0.70            | ✓      |
| Enjoy these pictures from the <b>&lt;API&gt; Calendar() → Today is Friday, April 19, 2013. &lt;/API&gt;</b> Easter Egg Hunt.                                                                                                                                                                                                                                                                                                                                                                                                                                                                  | 0.33            | ✓      |
| 85 patients (23%) were hospitalised alive and admitted to a hospital ward. Of them, <b>&lt;API&gt; Calculator(85 / 23) → 3.70 &lt;/API&gt;</b> 65% had a cardiac aetiology [...]                                                                                                                                                                                                                                                                                                                                                                                                              | -0.02           | ✗      |
| But hey, after the <b>&lt;API&gt; Calendar() → Today is Saturday, June 25, 2011. &lt;/API&gt;</b> Disneyland fiasco with the fire drill, I think it’s safe to say Chewey won’t let anyone die in a fire.                                                                                                                                                                                                                                                                                                                                                                                      | -0.41           | ✗      |
| The last time I was with <b>&lt;API&gt; QA(Who was last time I was with?) → The Last Time &lt;/API&gt;</b> him I asked what he likes about me and he said he would tell me one day.                                                                                                                                                                                                                                                                                                                                                                                                           | -1.23           | ✗      |

Table 4: Examples of API calls for different tools, sorted by the value of  $L_i^- - L_i^+$  that is used as a filtering criterion. High values typically correspond to API calls that are intuitively useful for predicting future tokens.

222 Many of the tools we use cannot be called ‘incorrectly’, taking either no arguments or strings as  
223 inputs—all of which are valid as API calls. In the case of the Calculator tool, at data-augmentation  
224 time, we see many incorrect/invalid generations (even with constrained decoding to arithmetic tokens),  
225 but since the final dataset contains useful, correct API calls, the fine-tuned model often generates valid  
226 calculations. However, these calls are often very simple (often operations involving two numbers),  
227 and have low complexity.

228 **Receiving the wrong result or reasoning failures** In some cases we see that a tool response is  
229 either useless or incorrect—most often this can be seen with the WikiSearch tool which uses a naive  
230 BM25 information retrieval algorithm on Wikipedia. The model’s response to this varies, sometimes  
231 ignoring the result of the tool while at other times incorporating it. More investigation is needed to  
232 understand when or why a tool is ignored. Anecdotally, we observe that the natural continuation  
233 requires a highly specific answer, but the tool has not returned it—for instance “Harry Styles was  
234 born in [WikiSearch(Harry styles) → Harry Styles is a British singer and actor, who has starred in  
235 My Policeman] Worcestershire.”

Table 5: Number of final datapoints generated by the LLaMA model, compared to the GPT-J model. Note the LLaMA v1 7B WikiSearch was generated with  $k = 2$ , instead of  $k = 5$ , to save compute, since the maximum number of points per tool was predetermined to be 25,000.

|                                      | QA     | WikiSearch |
|--------------------------------------|--------|------------|
| <i>Threshold <math>\tau_f</math></i> | 1      | 1          |
| <i>Generated Examples</i>            |        |            |
| GPT-J                                | 18,526 | 60,974     |
| LLaMA v1 7B                          | 32,180 | 22,891     |

## 236 G LLAMA BASE MODEL INVESTIGATIONS

### 237 G.1 Motivation

238 Following the contemporaneous release of the LLaMA v1 models with this paper, we subsequently  
 239 investigated the application of the Toolformer method to the LLaMA v1 7B base model. The purpose  
 240 of this investigation was to discover to what degree tool-use would improve as model capability  
 241 improved, in particular examining 2 separate tools: Question Answering (QA) and WikiSearch.

### 242 G.2 Method

243 We followed the same generation procedure as described in Section 4.1, generating data for each tool  
 244 from the same datasets, using the same hyperparameters as in Appendix A, albeit with hyperparameter  
 245  $k = 2$  for the WikiTool (to save compute on generations). We used the same LLaMA v1 base model  
 246 to score our datasets, and used the same scoring thresholds to select data as for GPT-J. We split these  
 247 into a development and train set, as with GPT-J, with final quantities of each training dataset shown  
 248 in Table 5. We then finetuned the model as in Appendix B, albeit with learning rate  $2e^{-6}$ .

249 We evaluated the model with the same protocol described in Section 4.2. We used the same prompts  
 250 as Appendix C.1 for LAMA, and for Question Answering tasks we used the prompt in Appendix C.5.  
 251 We used this prompt because it is standard in evaluations of QA Tasks, and was used in LLaMA’s  
 252 own evals. The difference in outcomes between using this prompt, and the original one in Section  
 253 C.3 shows a stark improvement, and can be seen in Table 7.

### 254 G.3 Results

255 Table 7 shows the performance of a base LLaMA 7B model, evaluated using the protocol in Sec-  
 256 tion 4.2, and prompts from Appendix C. These show that the LLaMA base model is much more  
 257 generally capable than GPT-J, especially when using the correct prompts, outperforming both GPT-J  
 258 and Toolformer on all QA Tasks - despite no access to the WikiSearch tool.

259 Table 8 shows the performance of the LLaMA-Toolformer model, compared with the original LLaMA  
 260 base model. It is also compared to a toolformer trained by fine-tuning LLaMA with the original  
 261 GPT-J Toolformer data. In this we see that both models show improvements using the QA tool on the  
 262 LAMA tasks, and both show deterioration in using the WikiSearch tool on the QA tasks, although in  
 263 both tasks, the LLaMA-Toolformer method seems to generally show a greater aptitude with active  
 264 tool use, than its GPT-J-data counterpart.

### 265 G.4 Discussion

266 We believe these results indicate some subtleties around how tool-strength, model strength and the  
 267 synthetic dataset curation interact, and present discussions in the following subsections.

#### 268 G.4.1 Tool Utility

269 A key factor in explaining the strong performance of the LLaMA-Toolformer of LAMA tasks, but  
 270 weak performance on QA tasks can be seen by examining the two key tools for each task.

Table 6: Number of final examples, generating on 1% of the CCNet data and scoring with various models and taking the best example per generation location.  $k$  represents the maximum number of generation locations per paragraph, and  $m$  represents the number of generations per location. Note that fewer GPT-J generations meet the threshold  $\tau_f$  when scored by LLaMA instead of GPT-2.

| Generation Model<br>Scoring Model  | GPT-J<br>GPT-2 | GPT-J<br>LLaMA | LLaMA<br>LLaMA |
|------------------------------------|----------------|----------------|----------------|
| $\tau_f = 0.5, m = 5, tool = QA$   |                |                |                |
| $k = 5$                            | 1166           | 308            | 1691           |
| $k = 2$                            | 719            | 214            | 1032           |
| $k = 1$                            | 98             | 39             | 586            |
| $\tau_f = 0.5, m = 5, tool = Wiki$ |                |                |                |
| $k = 5$                            | 1206           | 426            | 1294           |
| $k = 2$                            | 753            | 264            | 837            |
| $k = 1$                            | 76             | 76             | 463            |
| $\tau_f = 1, m = 5, tool = QA$     |                |                |                |
| $k = 5$                            | 437            | 61             | 592            |
| $k = 2$                            | 254            | 48             | 392            |
| $k = 1$                            | 41             | 19             | 239            |
| $\tau_f = 1, m = 5, tool = Wiki$   |                |                |                |
| $k = 5$                            | 324            | 107            | 361            |
| $k = 2$                            | 215            | 67             | 212            |
| $k = 1$                            | 23             | 22             | 135            |

271 The QA tool, used in LAMA tasks, consists of a much larger Atlas model that provides a succinct  
 272 answer to a question, whereas the WikiSearch tool, used in QA tasks, consists of a ‘bag of words’-  
 273 based BM-25 algorithm that retrieves a longer passage from Wikipedia. The former tool is accurate  
 274 with highly targeted answer, whereas the latter is much noisier and returns a less focused answer.  
 275 This makes the QA tool far more useful for the format of our evaluation than the WikiSearch tool.

276 In fact, qualitative investigation revealed that the WikiSearch tool often hindered performance by  
 277 distracting the model, by frequently the returning passages that did not contain the relevant answer, or  
 278 may even have concerned a different topic entirely. This was corroborated by the fact that increasing  
 279 the triggering of API calls was observed to decrease the final scores for all QA tasks, and the LLaMA  
 280 base model already surpassed the GPT-J Toolformer using the same tool.

281 The implication of this finding is that tools may vary in utility to different models, and that a big  
 282 factor in this is the base model strength. A guiding principle should thus be that tool utility will  
 283 depend on the existing strength of the underlying model on some task. *Strong models need tools that*  
 284 *can address their weaknesses.*

## 285 G.4.2 Generating and Scoring

286 A key feature of the Toolformer method is the scoring of generated data to select how ‘useful’ a tool  
 287 call is in lowering the loss of the base model. Our results in Table 8 demonstrate that finetuning a  
 288 LLaMA model on data generated and scored by itself (LLaMA-Toolformer), slightly outperforms  
 289 one finetuned on data generated by GPT-J and scored by GPT-2 (LLaMA + GPT-J data).

290 We investigated how the scoring distributions changed between these two datasets, by performing an  
 291 ablation in generating and scoring from the same 1% of the CCNet Data. Our results are shown in  
 292 Table 6.

293 We find that GPT-J-generated data was much less likely to score highly under LLaMA, though  
 294 it scored highly under GPT-2. We also found that the LLaMA model was much more capable at  
 295 generating data when only one sample was taken from the model at each API call point. Both results  
 296 were expected given the much stronger capabilities of LLaMA v1 7B compared to GPT-2, and seem  
 297 to suggest a benefit to scoring with the more capable model. *More capable base models benefit from*  
 298 *more capable scoring models.*



| Model      | LAMA Tasks  |             |             |                      | QA Tasks             |                      | Maths Tasks |             |             |
|------------|-------------|-------------|-------------|----------------------|----------------------|----------------------|-------------|-------------|-------------|
|            | SQuAD       | Google-RE   | T-REx       | WebQS                | NQ                   | TriviaQA             | ASDiv       | SVAMP       | MAWPS       |
| GPT-J      | 17.8        | 4.9         | 31.9        | 18.5                 | 12.8                 | 43.9                 | 7.5         | 5.2         | 9.9         |
| Toolformer | 22.1        | 6.3         | 34.9        | 18.9                 | 12.6                 | 46.7                 | 14.8        | 6.3         | 15.0        |
| (disabled) |             |             |             |                      |                      |                      |             |             |             |
| Toolformer | <b>33.8</b> | <b>11.5</b> | <b>53.5</b> | 26.3                 | 17.7                 | 48.8                 | 40.4        | 29.4        | 44.0        |
| LLaMA 7B   | 27.2        | 1.1         | 40.3        | 21.1 ( <b>36.2</b> ) | 16.9 ( <b>25.4</b> ) | 26.7 ( <b>59.2</b> ) | <b>41.0</b> | <b>34.9</b> | <b>48.2</b> |

Table 7: Results demonstrating the broad ability of the LLaMA v1 7B base model, compared to GPT-J and GPT-J-based Toolformer. Results using the modified prompt from Appendix C.5 are presented in brackets. The LLaMA v1 7B already outperforms the Toolformer in all tasks QA and Maths tasks tool-free, provided the right prompt.

| Model                         | LAMA Tasks  |             |             |             | QA Tasks    |             |
|-------------------------------|-------------|-------------|-------------|-------------|-------------|-------------|
|                               | SQuAD       | Google-RE   | T-REx       | WebQS       | NQ          | TriviaQA    |
| LLaMA v1 7B                   | 27.2        | 1.1         | 40.3        | 36.2        | 25.4        | 59.2        |
| LLaMA-Toolformer (disabled)   | 27.7        | 1.1         | 41.8        | <b>37.0</b> | <b>27.6</b> | <b>60.2</b> |
| LLaMA-Toolformer              | <b>30.0</b> | <b>12.3</b> | <b>55.5</b> | 36.6        | 26.9        | 57.8        |
| LLaMA + GPT-J data (disabled) | 27.2        | 1.1         | 40.3        | <b>37.1</b> | <b>27.1</b> | <b>59.7</b> |
| LLaMA + GPT-J data            | <b>28.6</b> | <b>11.1</b> | <b>54.2</b> | 35.7        | 26.8        | 55.7        |

Table 8: Results of the Toolformer method applied to the LLaMA base model. “LLaMA-Toolformer” represents a Toolformer trained on LLaMA generated and scored data, “LLaMA + GPT-J data” represents LLaMA fine-tuned on the data used to train the original GPT-J Toolformer. Both toolformers benefit from use of the strong QA tool, and neither benefit from the use of the weak WikiSearchTool tool. Only LLaMA + GPT-J data benefits from the Calculator, since it was trained on an order of magnitude more data - the LLaMA-Toolformer failed to call the tool.

## 299 G.5 Failed Investigations with Calculator

300 Finally we also investigated experiments with the Calculator tool, rerunning generation with approx-  
301 imately half the original CCNet data. We ran experiments with only this data on account of the  
302 extensive compute requirements needed to generate calculator data, which requires many ‘repeat  
303 attempts’ to generate a valid call. Although we generated and scored from half the data, we were  
304 only able to generate 401 examples at a  $\tau_f$  threshold of 0.5, an order of magnitude less than GPT-J,  
305 and from this limited data we were not able to elicit any tool use from the model. We hypothesize  
306 that this was down to the fact that appropriate locations for Calculator calls are relatively sparse in  
307 CCNet, and the LLaMA models are already highly competent in simple mathematics - outperforming  
308 both GPT-J and Toolformer on our benchmark tasks. In future we recommend generating examples  
309 from either more maths-based training datasets or human annotations.

## 310 References

- 311 Marta R Costa-jussà, James Cross, Onur Çelebi, Maha Elbayad, Kenneth Heafield, Kevin Heffernan,  
312 Elahe Kalbassi, Janice Lam, Daniel Licht, Jean Maillard, et al. 2022. No language left behind:  
313 Scaling human-centered machine translation. *arXiv preprint arXiv:2207.04672*.
- 314 Gautier Izacard, Patrick Lewis, Maria Lomeli, Lucas Hosseini, Fabio Petroni, Timo Schick, Jane  
315 Dwivedi-Yu, Armand Joulin, Sebastian Riedel, and Edouard Grave. 2022. Atlas: Few-shot learning  
316 with retrieval augmented language models.
- 317 Armand Joulin, Edouard Grave, Piotr Bojanowski, Matthijs Douze, Herve Jégou, and Tomas Mikolov.  
318 2016. Fasttext. zip: Compressing text classification models. *arXiv preprint arXiv:1612.03651*.
- 319 Tom Kwiatkowski, Jennimaria Palomaki, Olivia Redfield, Michael Collins, Ankur Parikh, Chris  
320 Alberti, Danielle Epstein, Illia Polosukhin, Jacob Devlin, Kenton Lee, Kristina Toutanova, Llion  
321 Jones, Matthew Kelcey, Ming-Wei Chang, Andrew M. Dai, Jakob Uszkoreit, Quoc Le, and Slav

- 322     Petrov. 2019. Natural questions: A benchmark for question answering research. *Transactions of*  
323     *the Association for Computational Linguistics*, 7:452–466.
- 324     Jeff Rasley, Samyam Rajbhandari, Olatunji Ruwase, and Yuxiong He. 2020. Deepspeed: System op-  
325     timizations enable training deep learning models with over 100 billion parameters. In *Proceedings*  
326     *of the 26th ACM SIGKDD International Conference on Knowledge Discovery Data Mining*, KDD  
327     ’20, page 3505–3506, New York, NY, USA. Association for Computing Machinery.
